# Supplementary material
Source: Springer Nature journal article supplement (https://www.springermedizin.de/resource/supplementary/12907_2013_193_MOESM7_ESM.pdf/9524774)

Figure 4

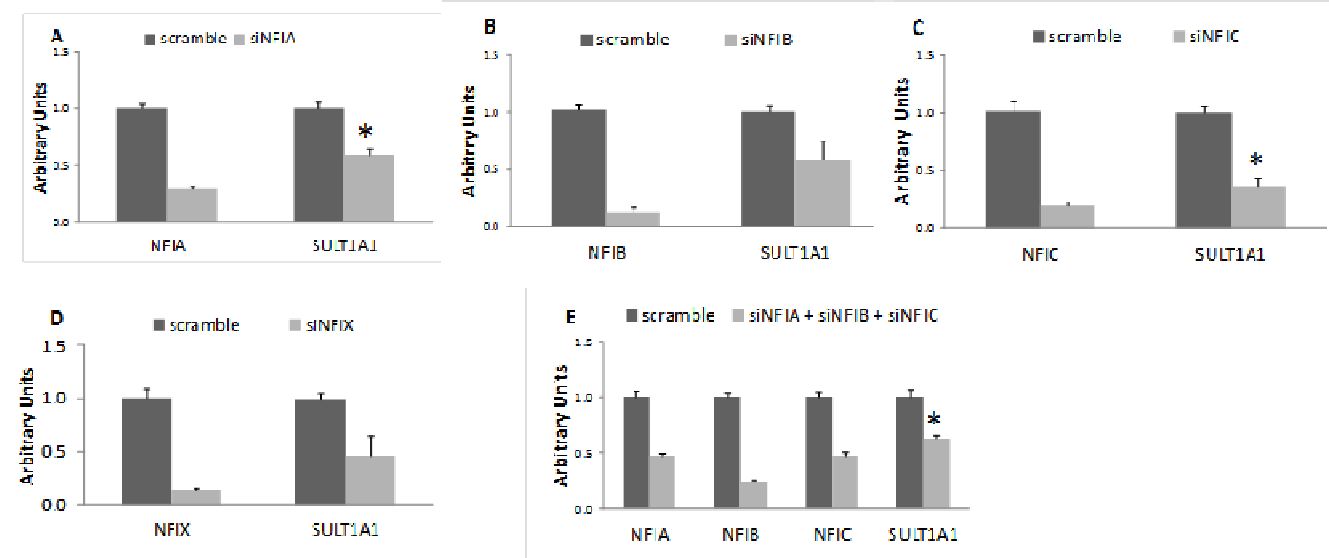

Supplement: MOESM7 [file 9524774]
